# Supplementary material
Source: publisher figshare collection journal article supplement (https://gsapubs.figshare.com/ndownloader/files/22741871)
Supplement: Supplementary file 1 [file 22741871]

Table 1

| Sample<br>1 | ppm |      |                 | Age (Ma) <sup>4</sup> |         |         |         | E <sup>5</sup> |
|-------------|-----|------|-----------------|-----------------------|---------|---------|---------|----------------|
|             | U   | Th   | Pb <sup>2</sup> | 204/206 <sup>3</sup>  | 206/238 | 208/235 | 207/206 |                |
| NMO         | 215 | n.d. | 37              | .0010                 | 897     | 1170    | 1719    | 9              |
| MO          | 262 | n.d. | 52              | .0036                 | 913     | 1204    | 1773    | 5              |
| M1          | 315 | n.d. | 51              | .0019                 | 815     | 1086    | 1678    | 8              |
| M2          | 319 | n.d. | 55              | .0024                 | 847     | 1159    | 1801    | 9              |
| M4          | 197 | n.d. | 33              | .0066                 | 685     | 957     | 1648    | 8              |
| 1           | 294 | 228  | 118             | .0003                 | 1902    | 2004    | 2111    | 42             |
| 2           | 384 | 183  | 158             | .0003                 | 2079    | 2117    | 2154    | 34             |
| 3           | 60  | 24   | 25              | .0012                 | 2068    | 2067    | 1967    | 156            |
| 4           | 122 | 115  | 78              | .0003                 | 2677    | 2680    | 2683    | 40             |
| 5           | 127 | 42   | 51              | .0003                 | 2105    | 2083    | 2062    | 58             |
| 6           | 138 | 28   | 59              | .0003                 | 2279    | 2196    | 2120    | 54             |
| 7           | 803 | 997  | 407             | <                     | 2167    | 2123    | 2081    | 18             |
| 8           | 262 | 173  | 89              | .0003                 | 1735    | 1726    | 1717    | 54             |
| 9           | 62  | 32   | 28              | .0003                 | 2180    | 2201    | 2221    | 78             |
| 10          | 167 | 70   | 65              | <                     | 2001    | 2043    | 2084    | 48             |
| 11          | 45  | 44   | 5               | .0028                 | 635     | -       | -       | 44             |
| 12          | 149 | 66   | 13              | .0019                 | 546     | -       | -       | 24             |
| 13          | 117 | 60   | 34              | .0005                 | 1587    | 1518    | 1424    | 134            |
| 14          | 107 | 90   | 11              | .0006                 | 576     | -       | -       | 26             |
| 15          | 277 | 160  | 168             | <                     | 2735    | 2702    | 2678    | 20             |
| 16          | 81  | 51   | 40              | <                     | 2321    | 2300    | 2282    | 62             |
| 17          | 337 | 255  | 36              | .0007                 | 609     | -       | -       | 24             |
| 18          | 474 | 275  | 220             | .0001                 | 2227    | 2219    | 2212    | 22             |
| 19          | 92  | 104  | 10              | .0022                 | 501     | -       | -       | 32             |
| 20          | 507 | 509  | 223             | .0001                 | 2002    | 2027    | 2053    | 26             |
| 21          | 216 | 367  | 24              | .0011                 | 515     | -       | -       | 22             |
| 22          | 221 | 204  | 25              | .0003                 | 597     | -       | -       | 24             |
| 23          | 259 | 339  | 34              | .0006                 | 637     | -       | -       | 26             |
| 24          | 198 | 150  | 26              | .0025                 | 729     | 906     | 1368    | 334            |
| 25          | 508 | 334  | 55              | .0008                 | 019     | -       | -       | 26             |
| 26          | 221 | 189  | 20              | .0016                 | 520     | -       | -       | 22             |
| 27          | 182 | 139  | 18              | .0007                 | 549     | -       | -       | 24             |
| 28          | 169 | 169  | 16              | .0018                 | 518     | -       | -       | 22             |
| 29          | 55  | 42   | 19              | .0002                 | 1693    | 1723    | 1758    | 312            |
| 30          | 169 | 83   | 56              | <                     | 1664    | 1844    | 2053    | 40             |
| 31          | 296 | 307  | 32              | .0002                 | 577     | -       | -       | 24             |
| 32          | 264 | 99   | 24              | .0007                 | 563     | -       | -       | 24             |
| 33          | 281 | 58   | 24              | .0003                 | 547     | -       | -       | 22             |

|     |     |     |     |       |      |      |      |    |
|-----|-----|-----|-----|-------|------|------|------|----|
| 34  | 37  | 30  | 3   | .0066 | 609  | -    | -    | 52 |
| 35  | 167 | 233 | 19  | <     | 541  | -    | -    | 22 |
| 36  | 237 | 104 | 103 | .0003 | 2165 | 2143 | 2123 | 50 |
| 37  | 245 | 172 | 23  | .0006 | 595  | -    | -    | 24 |
| 38  | 425 | 235 | 41  | .0009 | 576  | -    | -    | 24 |
| 39  | 446 | 499 | 49  | .0005 | 567  | -    | -    | 24 |
| 40  | 578 | 379 | 291 | <     | 2336 | 2388 | 2433 | 14 |
|     |     |     |     |       |      |      |      |    |
| 41g | 199 | 148 | 21  | .0002 | 597  | -    | -    | 13 |
| 42g | 524 | 723 | 64  | <     | 584  | -    | -    | 13 |
| 43g | 259 | 147 | 27  | <     | 605  | -    | -    | 13 |
| 44g | 144 | 92  | 95  | <     | 2862 | 2810 | 2772 | 13 |
| 45g | 312 | 256 | 239 | <     | 3064 | 3119 | 3154 | 6  |
| 46g | 614 | 323 | 56  | .0003 | 541  | -    | -    | 12 |

Notes: 1) Samples are listed by magnetic fraction for conventional analyses (NMO, non-magnetic, O<sup>o</sup>) and by grain number for SHRIMP analyses, 41-46 are granite samples (g); 2) Pb is radiogenic Pb; 3) numerical ratios are for appropriate U and Pb isotopes (e.g.,  $204/206 = {}^{204}\text{Pb}/{}^{206}\text{Pb}$ ) and < is for values less than .0001; 4) ages are calculated from ratios corrected for blank and common Pb (Stacey and Kramers, 1975; conventional analyses) and for Cumming and Richards (1975) common Pb for SHRIMP analyses, dash is for no age calculated; 5) two sigma errors for  $207/206$  and  $206/238$  ages as appropriate.

#### Further Analytical Notes:

Zircon micro-analysis was undertaken by SHRIMP. Repeat analyses of the standard Sri Lankan zircon SL13 ( ${}^{206}\text{Pb}/{}^{238}\text{U}=0.0928$ ; 572 Ma) during the analytical sessions were used to determine U, Th, and Pb abundances and to calibrate inter-element isotopic ratios in the unknowns. Pb isotopic ratios were determined directly, with their uncertainties governed by ion-counting statistics. The majority of the unknowns yielded very low  ${}^{204}\text{Pb}$  count rates. The very small amount of non-radiogenic Pb reflected by the very low  ${}^{204}\text{Pb}$  count rate is modeled as Cumming and Richards (1975) 400 Ma Pb, the likely age of deposition of the sediment. The  ${}^{208}\text{Pb}$ -common Pb correction method (Compston et al. 1984) has been employed on the (well-preserved) <650 Ma zircons because it is more accurate and precise than the conventional  ${}^{204}\text{Pb}$  correction method for such young zircons, unless they have extremely low Th abundances. At the very low common Pb contents observed in the <650 Ma zircons, however, calculated  ${}^{206}\text{Pb}/{}^{238}\text{U}$  ages are largely insensitive to the choice of common Pb composition and correction method. For the older zircons

(with greater accumulated radiogenic  $^{206}\text{Pb}$  and  $^{207}\text{Pb}$ ), the more commonly-used  $^{204}\text{Pb}$  correction method was used and  $^{207}\text{Pb}/^{206}\text{Pb}$  ages are discussed. More detailed descriptions of the analytical procedures for the conventional analyses can be found in Mueller et al. (1988) and for single grains (SHRIMP) in Compston et al. (1984) and Compston & Williams (1992). Sm-Nd data were obtained from whole-rock powder for both samples using standard procedures (Heatherington and Mueller, 1991). Values obtained for the sandstone are: Sm=1.11 ppm; Nd = 10.9 ppm;  $^{143}\text{Nd}/^{144}\text{Nd}$  = 0.51189 and for the granitoid, Sm = 3.16; Nd = 10.7;  $^{143}\text{Nd}/^{144}\text{Nd}$  = .51230. Ages have been calculated using the decay constants and present-day  $^{238}\text{U}/^{235}\text{U}$  recommended by the IUGS Subcommittee on Geochronology (Steiger and Jäger, 1977).

#### Additional references:

- Compston, W., Williams, I., and Meyer, C., 1984, U-Pb geochronology of zircons from lunar breccia 73217 using a sensitive high mass-resolution ion microprobe: *Journal of Geophysical Research*, v. 89, Supplement B, p. 525-534.
- Compston, W. and Williams, I., 1992, Ion probe ages for the British Ordovician and Silurian stratotypes. *Global Perspectives on Ordovician Geology* (Webby and Laurie, eds.) Bolkema, Rotterdam, p. 59-67.
- Cummings, G. and Richards, J., 1975, Ore lead isotopic ratios in a continuously changing Earth: *Earth and Planetary Science Letters*, v. 28, p. 155-171.
- Heatherington, A. and Mueller, P., 1991, Geochemical evidence for Triassic rifting in southwestern Florida: *Tectonophysics*, v. 188, p. 291-302.
- Mueller, P., Shuster, R., Graves, M., Wooden, J., and Bowes, D., 1988, Age and composition of a late Archean magmatic complex, Beartooth Mountains, Montana-Wyoming: *Mont. Bur. Mines and Geol. Spec. Publ.* 96, p. 23-42.
- Stacey, J. and Kramers, J., 1975, Approximation of terrestrial lead isotope evolution by a two stage model: *Earth and Planetary Science Letters*, v. 26, p. 381- 399.
- Steiger, R. and Jager, E., 1977, Subcommittee on geochronology: Convention on use of decay constants in geo- and cosmochemistry: *Earth and Planetary Science Letters*, v. 36, p. 359-362.
